# Supplementary material for: Dipyrrin complex assisted in situ synthesis of ultra-small gold nanoparticles decorated on a partially reduced graphene oxide nanocomposite for efficient catalytic reduction of Cr(vi) to Cr(iii)
Source: Royal Society of Chemistry journal article supplement (doi:10.1039/c6ra03835b), 2016-01-01
Supplement: c6ra03835b1.pdf [file c6ra03835b1.pdf]

## Electronic Supplementary Information

### **Dipyrrin complex assisted in-situ synthesis of ultra-small gold nanoparticles decorated on partially reduced graphene oxide nanocomposite for efficient catalytic reduction of Cr(VI) to Cr(III)**

Rakesh Kumar Gupta,<sup>a</sup> Vinod Kumar,<sup>b</sup> Anchal Srivastava<sup>b</sup> and Daya Shankar Pandey\*<sup>a</sup>

<sup>a</sup>Department of Chemistry, Institute of Science, Banaras Hindu University, Varanasi - 221 005 (U.P.), India

<sup>b</sup>Department of Physics, Institute of Science, Banaras Hindu University, Varanasi - 221 005 (U.P.), India

#### **Contents**

---

|     |                                                                                 |         |
|-----|---------------------------------------------------------------------------------|---------|
| 1.  | Experimental details.....                                                       | S2      |
| 2.  | Synthesis of pypdpmH, 1, AuNPs and AuNPs@prGO nanocomposites.....               | S2-S4   |
| 3.  | X-ray structure determination.....                                              | S4      |
| 4.  | Catalytic study.....                                                            | S4-S5   |
| 5.  | Scheme showing synthesis of the ligand and complex.....                         | S5      |
| 6.  | ESI-MS of ligand and 1.....                                                     | S6-S7   |
| 7.  | <sup>1</sup> H and <sup>13</sup> C NMR spectra of ligand and 1.....             | S8-S9   |
| 8.  | Molecular structure of complex 1.....                                           | S10     |
| 9.  | Colour changes of 1 and after addition of HAuCl <sub>4</sub> .....              | S10     |
| 10. | Colour changes of ligand and after addition of HAuCl <sub>4</sub> .....         | S10     |
| 11. | TEM image of AuNPs synthesized from ligand.....                                 | S11     |
| 12. | Colour changes of AuNPs in different solvent.....                               | S11     |
| 13. | Colour changes of AuNPs and AuNPs@prGO.....                                     | S11     |
| 14. | FT IR and Raman spectra of GO and AuNPs@prGO500.....                            | S12     |
| 15. | SEM images of AuNPs and AuNPs@prGO.....                                         | S13-S14 |
| 16. | TEM image of AuNPs.....                                                         | S15     |
| 17. | EDX pattern of AuNPs.....                                                       | S15     |
| 18. | Catalytic reduction of Cr(VI).....                                              | S16     |
| 19. | Recyclability of AuNPs@prGO500 for Cr(VI) to Cr(III) reduction.....             | S17     |
| 20. | TEM image of AuNPs@prGO500 after 1 <sup>st</sup> cycle of Cr(VI) reduction..... | S17     |
| 21. | Crystal data and structure refinement for 1.....                                | S18     |
| 22. | Selected bond lengths (Å) and angles (°) for 1.....                             | S19     |

---

## EXPERIMENTAL SECTION

**Reagents.** All the reactions have been performed in deaerated solvents under nitrogen atmosphere. The solvents were purified following literature procedure prior to its use.<sup>15</sup> Diethyl amine, carbon disulfide, 2,3-dichloro-5,6-dicyano-1,4-benzoquinone (DDQ), 4-fluorobenzaldehyde, H<sub>2</sub>AuCl<sub>4</sub>, pyrrole, and nickel(II) chloride hydrate were procured from Sigma Aldrich Chemical Co., USA and used as received without further purifications. The precursor complex [Ni(dedtc)<sub>2</sub>] and pypdmH [1-(pyridin-2-yl)piperazinephenyl-dipyrromethane] were synthesized and purified by literature procedures.<sup>16</sup>

**General Methods.** Elemental analyses for carbon, hydrogen, and nitrogen were performed on an Exeter Analytical Inc. model CE-440 CHN analyzer. IR and UV-vis spectra were acquired on a Varian 3300 FT-IR, Shimadzu UV-1601. <sup>1</sup>H (300 MHz) and <sup>13</sup>C (75.45 MHz) NMR spectra were obtained on a JEOL AL300 FT-NMR spectrometer using tetramethylsilane [Si(CH<sub>3</sub>)<sub>4</sub>] as an internal reference. Electrospray ionization mass spectrometric (ESI-MS) measurements were made on a THERMO Finnigan LCQ Advantage Max ion trap mass spectrometer. In a typical measurement, samples (10 μL) were dissolved in dichloromethane/acetonitrile (3:7, v/v) and introduced into the ESI source through a Finnigan surveyor auto sampler. Mobile phase (MeOH/MeCN:H<sub>2</sub>O, 90:10) flowed at a rate of 250 μL/min. Ion spray and capillary voltage were set at 5.3 KV and 34 V, respectively. The MS scans were run upto 2.5 min and spectra print-outs averaged of over 10 scans. TEM and HRTEM images were captured on HR TEM (JEOL JEM 2100) and FEI Technai 20 U Twin Transmission Electron Microscope. The samples were loaded over lacy carbon coated copper TEM grids (300 mesh) dried under ambient conditions, and imaged. Elemental mapping on the samples were performed using *in-situ* EDX-STEM (Oxford Instrument Inc, INCA X-sight).

### Synthesis:

#### Synthesis of ligand 1-(pyridine-2-yl)piperazinephenyldipyrromethane (pypdpmH)

To a degassed solution of 4-(4-pyridin-2-yl)piperazin-1-yl)benzaldehyde (2.68 g, 10.0 mmol) and pyrrole (6.9 mL, 100.0 mmol), catalytic amounts of trifluoroacetic acid (15.4 μL, 0.20 mmol) were added and stirred for 1 h under nitrogen atmosphere and then heated at 70 °C overnight. The reaction mixture was dissolved in CH<sub>2</sub>Cl<sub>2</sub> (50 mL) washed with 0.1 M NaOH (50 mL) followed by water (50 mL), dried over Na<sub>2</sub>SO<sub>4</sub> and concentrated under

reduced pressure. Flash chromatography of the crude product over silica gel (SiO<sub>2</sub>; hexanes:CH<sub>2</sub>Cl<sub>2</sub>, 1:1) yielded the dipyrromethane (pypdpmH) as a white solid. Yield: 75% (2.87 g). Anal. Calc for C<sub>24</sub>H<sub>25</sub>N<sub>5</sub>: requires: C, 75.17; H, 6.57; N, 18.26. Found: C, 62.21; H, 5.12; N, 6.91%. <sup>1</sup>H NMR (CDCl<sub>3</sub>, δ ppm): 3.23 (t, 4H, CH<sub>2</sub>, piperazine), 3.97 (t, 4H, CH<sub>2</sub>, piperazine), 5.42 (s, 1H, CH dipyrin), 5.92 (s, 2H, pyrrole), 6.14 (d, 2H, *J* = 3.0 Hz, pyrrole), 6.51 (t, 1H, pyridyl) 6.68 (s, 2H, pyrrole), 6.92 (d, 4H, *J* = 7.7 Hz, phenyl), 7.13 (d, 2H, *J* = 7.7 Hz, phenyl), 7.92 (bs, 2H, NH, pyrrole), 8.33 (d, 1H, *J* = 3.9 Hz, pyridyl). <sup>13</sup>C NMR (CDCl<sub>3</sub> δ ppm): 43.07 (piperazine), 45.25 (piperazine), 49.10 (*meso*-C), 106.94, 107.22, 108.28, 113.55, 116.33, 117.00, 129.09, 132.92, 133.47, 137.53, 147.95, 150.08, 159.37 (dipyrin). ESI-MS. (Calcd, found, *m/z*) 384.2110, 384.2110 [M + H]<sup>+</sup>.

### Synthesis of [Ni(pypdpm)(dedtc)] (1)

DDQ (0.114 g, 0.50 mmol) dissolved in benzene (20 mL) was added drop wise with stirring to an ice cooled stirring solution of pypdpmH (0.191 g, 0.50 mmol, dichloromethane, 30 mL) and reaction mixture stirred for an additional 1 h at room temperature (rt). After filtration it was concentrated to dryness under reduced pressure to afford a red brown solid. Resulting mass thus obtained was dissolved in dichloromethane (40 mL) and filtered to remove any solid impurities. Triethylamine (1 mL) and precursor complex [Ni(dedtc)<sub>2</sub>] (0.182 g, 0.50 mmol) were successively added to the filtrate and resulting reaction mixture stirred overnight at rt. It was concentrated to dryness under reduced pressure and ensuing product purified by column chromatography (SiO<sub>2</sub>; CH<sub>2</sub>Cl<sub>2</sub>/hexane, 60:40) to afford a red solid. Yield: (0.210 g; 72%). Anal. Calcd for C<sub>29</sub>H<sub>32</sub>N<sub>6</sub>NiS<sub>2</sub>: C, 59.29; H, 5.49; N 14.31. Found: C, 59.53; H, 5.35; N, 14.22. <sup>1</sup>H NMR (CDCl<sub>3</sub>, δ<sub>H</sub> ppm): 1.28 (t, 6H, CH<sub>2</sub>CH<sub>3</sub>), 3.36 (t, 4H, CH<sub>2</sub>, piperazine) 3.66 (q, 4H, CH<sub>2</sub>CH<sub>3</sub>), 4.01 (t, 4H, CH<sub>2</sub>, piperazine), 6.25 (d, 2H, *J* = 3.0 Hz, pyrrole) 6.53 (t, 1H, pyridyl), 6.66 (d, 2H, *J* = 3.6 Hz, pyrrole), 6.97 (d, 4H, *J* = 8.7 Hz, phenyl), 7.37 (d, 2H, *J* = 8.4 Hz, pyrrole), 8.34 (d, 2H, *J* = 4.8 Hz, pyrrole). <sup>13</sup>C NMR (CDCl<sub>3</sub>, δ<sub>C</sub> ppm): 12.40, 43.62, 44.29, 48.59, 110.19, 114.36, 117.19, 131.86, 131.95, 135.65, 146.68, 149.39, 157.77, 202.43. ESI-MS. Calcd, found: *m/z* 586.1483, 587.0561 [M + H]<sup>+</sup>. UV-vis (*c*, 1 × 10<sup>-5</sup>; THF:H<sub>2</sub>O, 10:90; λ<sub>max</sub> nm, ε M<sup>-1</sup> cm<sup>-1</sup>): 517 (1.67 × 10<sup>4</sup>), 456 (4.01 × 10<sup>4</sup>), 280 (6.46 × 10<sup>4</sup>).

## **Synthesis of gold nanoparticles (AuNPs) using complex 1**

Synthesis of AuNPs have been achieved by using **1** (*c*,  $1.0 \times 10^{-5}$ , THF : H<sub>2</sub>O, 10:90, 5 mL) and HAuCl<sub>4</sub> (*c*,  $1.0 \times 10^{-3}$ , H<sub>2</sub>O, 5  $\mu$ L) at room temperature. The colloidal solution containing AuNPs is stable for over six months as evidenced by UV–vis spectral studies.

## **Dispersion of as-synthesized gold nanoparticles (AuNPs) on graphene oxide (GO)**

The as-synthesized AuNPs were mixed with exfoliated graphene oxide in varying ratios (100, 300 and 500 mg/mL) by simply mixing for 5 min. It led to aggregation which was purified by centrifugation. The flocculated nanocomposites were dispersed in DMF and triple distilled water (5%, v/v) and used for analysis by UV–vis absorption spectroscopy, scanning electron (SEM) and transmission electron microscopy (TEM) analyses.

## **X-ray Structure Determination**

Single crystal X-ray data for **1** was acquired on a R-AXIS RAPID II diffractometer using Mo-K $\alpha$  radiation ( $\lambda = 0.71073$  Å) at single crystal X-ray diffraction center of the National Institute of Advanced Industrial Science and Technology (AIST), Osaka, Japan. The structure was solved by direct methods (SHELXS 97) and refined by full-matrix least squares on  $F^2$  (SHELX 97).<sup>17</sup> All the non-H atoms were treated anisotropically. H-atoms attached to carbon were geometrically fixed and refined using SHELX riding model. Computer program PLATON was used for analysing the interaction and stacking distances.<sup>18</sup> CCDC deposition No. 1057645 (**1**) contains supplementary crystallographic data for this paper. It can be had free of charge via <http://www.ccdc.cam.ac.uk/conts/retrieving.html> (or from the CCDC, 12 Union Road, Cambridge CB2 1EZ, UK; Fax: +44-1223-336033; E-mail: [deposit@ccdc.cam.ac.uk](mailto:deposit@ccdc.cam.ac.uk)).

## **Catalytic Study**

### **Catalytic reduction of aqueous solution of Cr(IV)**

To an aqueous solution of K<sub>2</sub>Cr<sub>2</sub>O<sub>7</sub> (0.2 mM, 3 mL), HCOOH (0.2 mL) and catalysts AuNPs, GO (*c*, 500 mg/mL), AuNPs@prGO100, AuNPs@prGO300 AuNPs@prGO500 (25  $\mu$ L, each) were added. After addition of the catalyst, yellow colour of solution turned colorless with increasing reaction time. The progress of reaction was monitored by UV-vis

spectroscopy after intervals. The absorption spectra of the solution were measured in the range of 200-800 nm. Presence of Cr(III) was further established by addition of an excess of NaOH, the colorless solution turned green which characterized the presence of Cr(III) due to the formation of hexahydroxochromate(III).

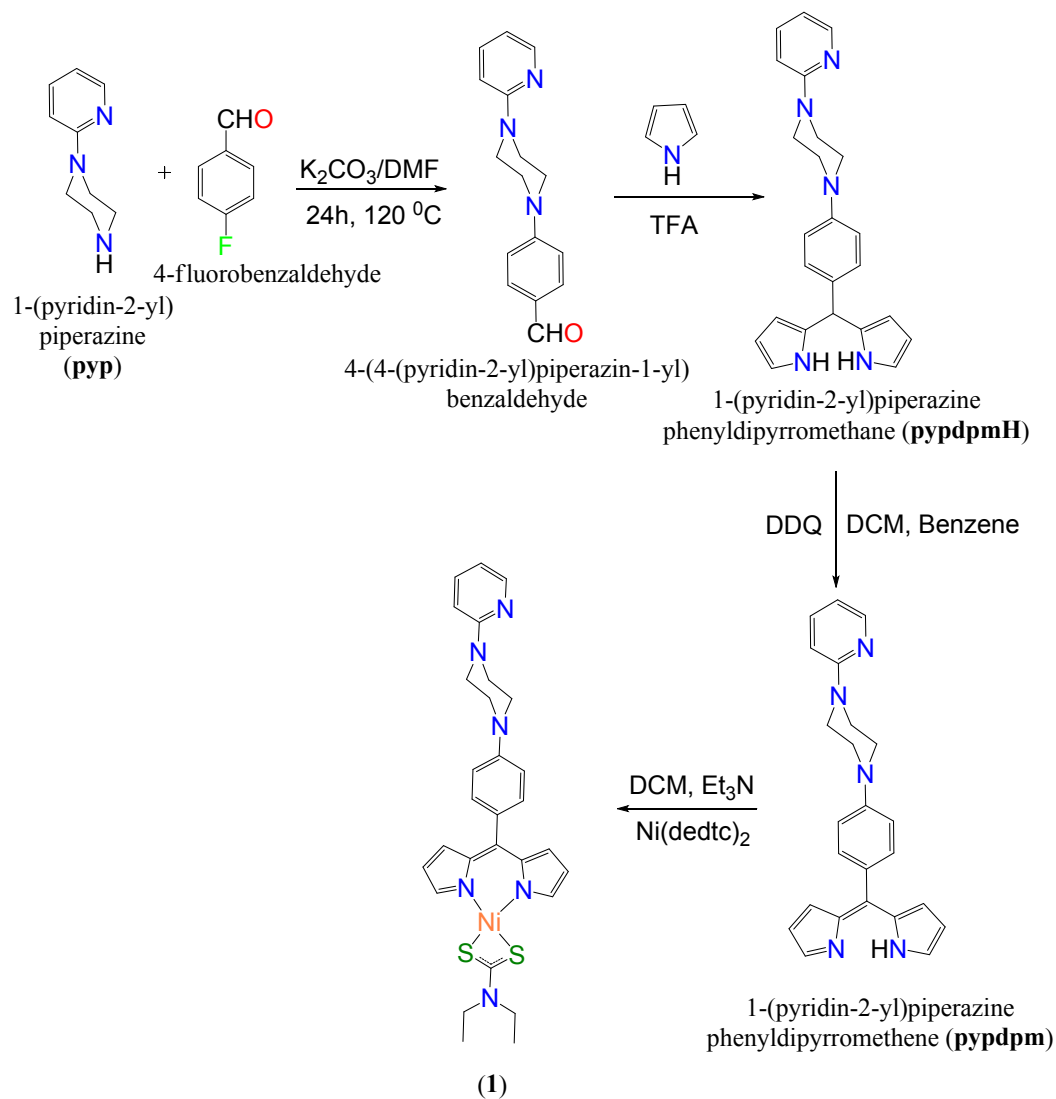

**Scheme S1** Showing synthesis of 4-(4-pyridin-2-yl)piperazin-1-yl)benzaldehyde, 1-(pyridine-2-yl)piperazinephenyldipyrromethane (pypzdpMH), 1-(pyridine-2-yl)piperazine-phenyldipyrromethene (pypzdpM) and heteroleptic complex **1**.

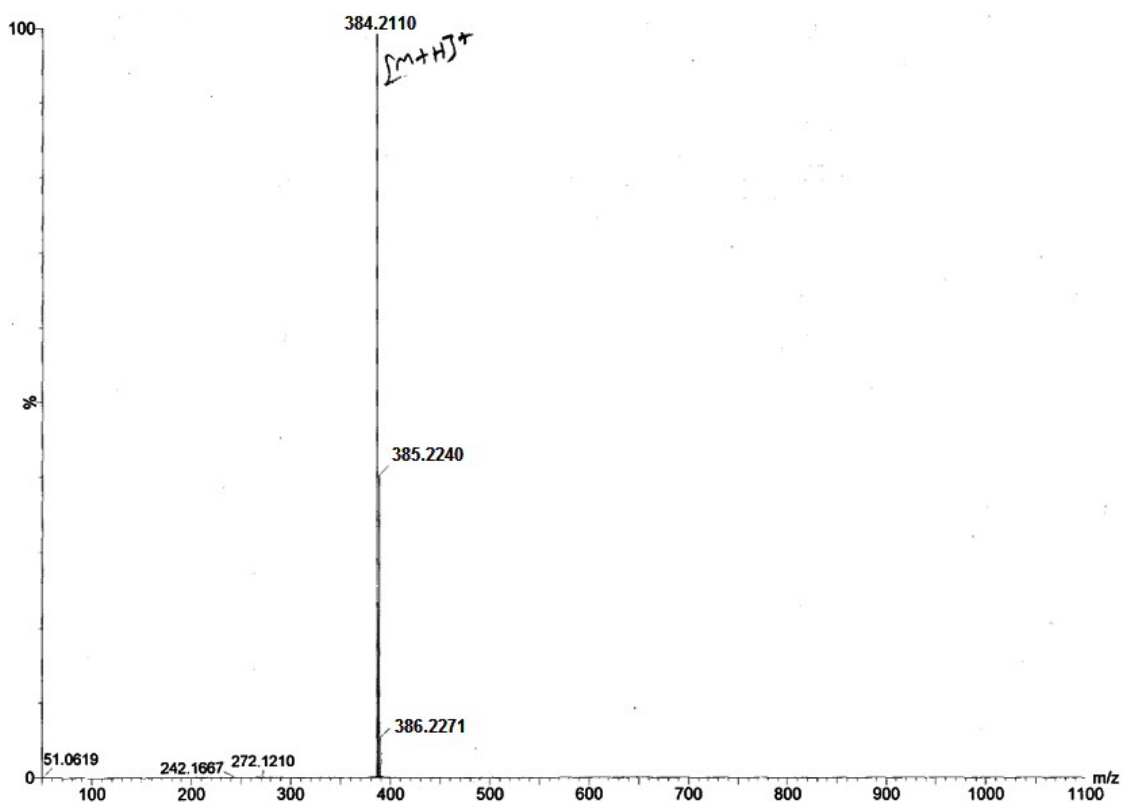

Fig. S1 ESI-MS of pypmdpmH.

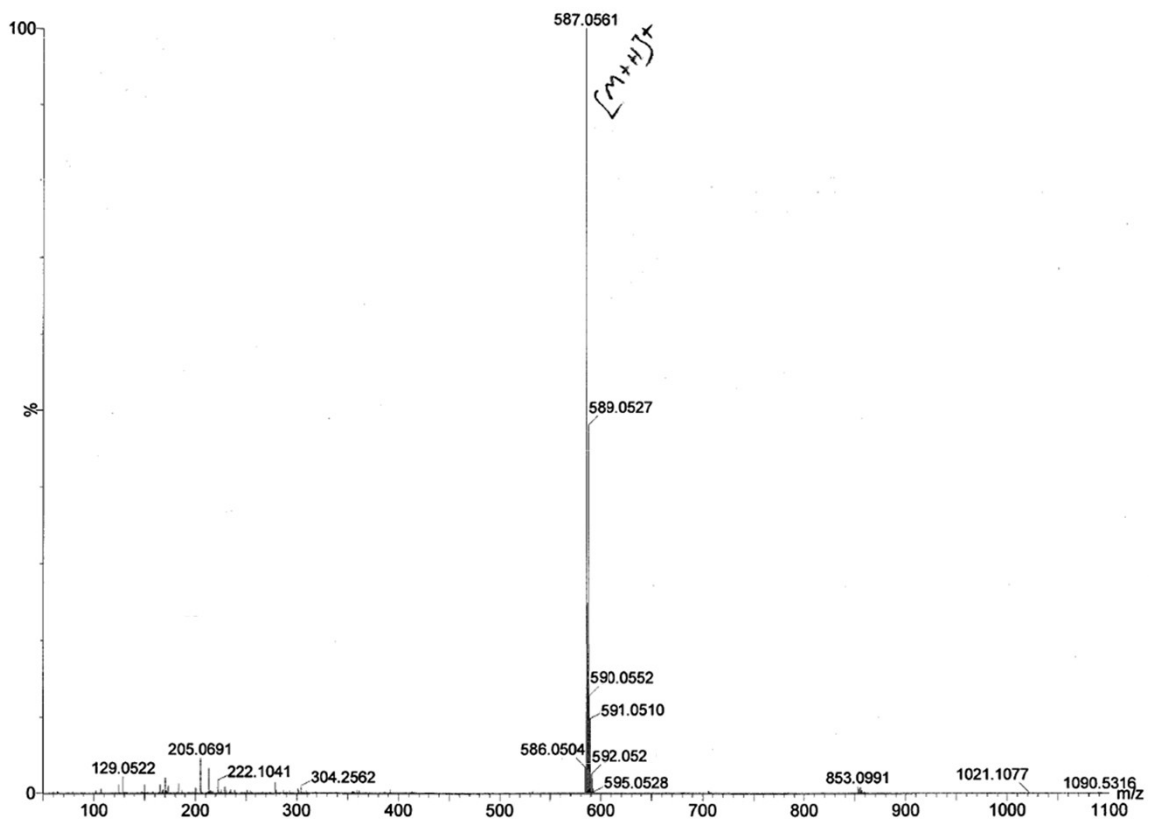

**Fig. S2** ESI-MS of complex 1.

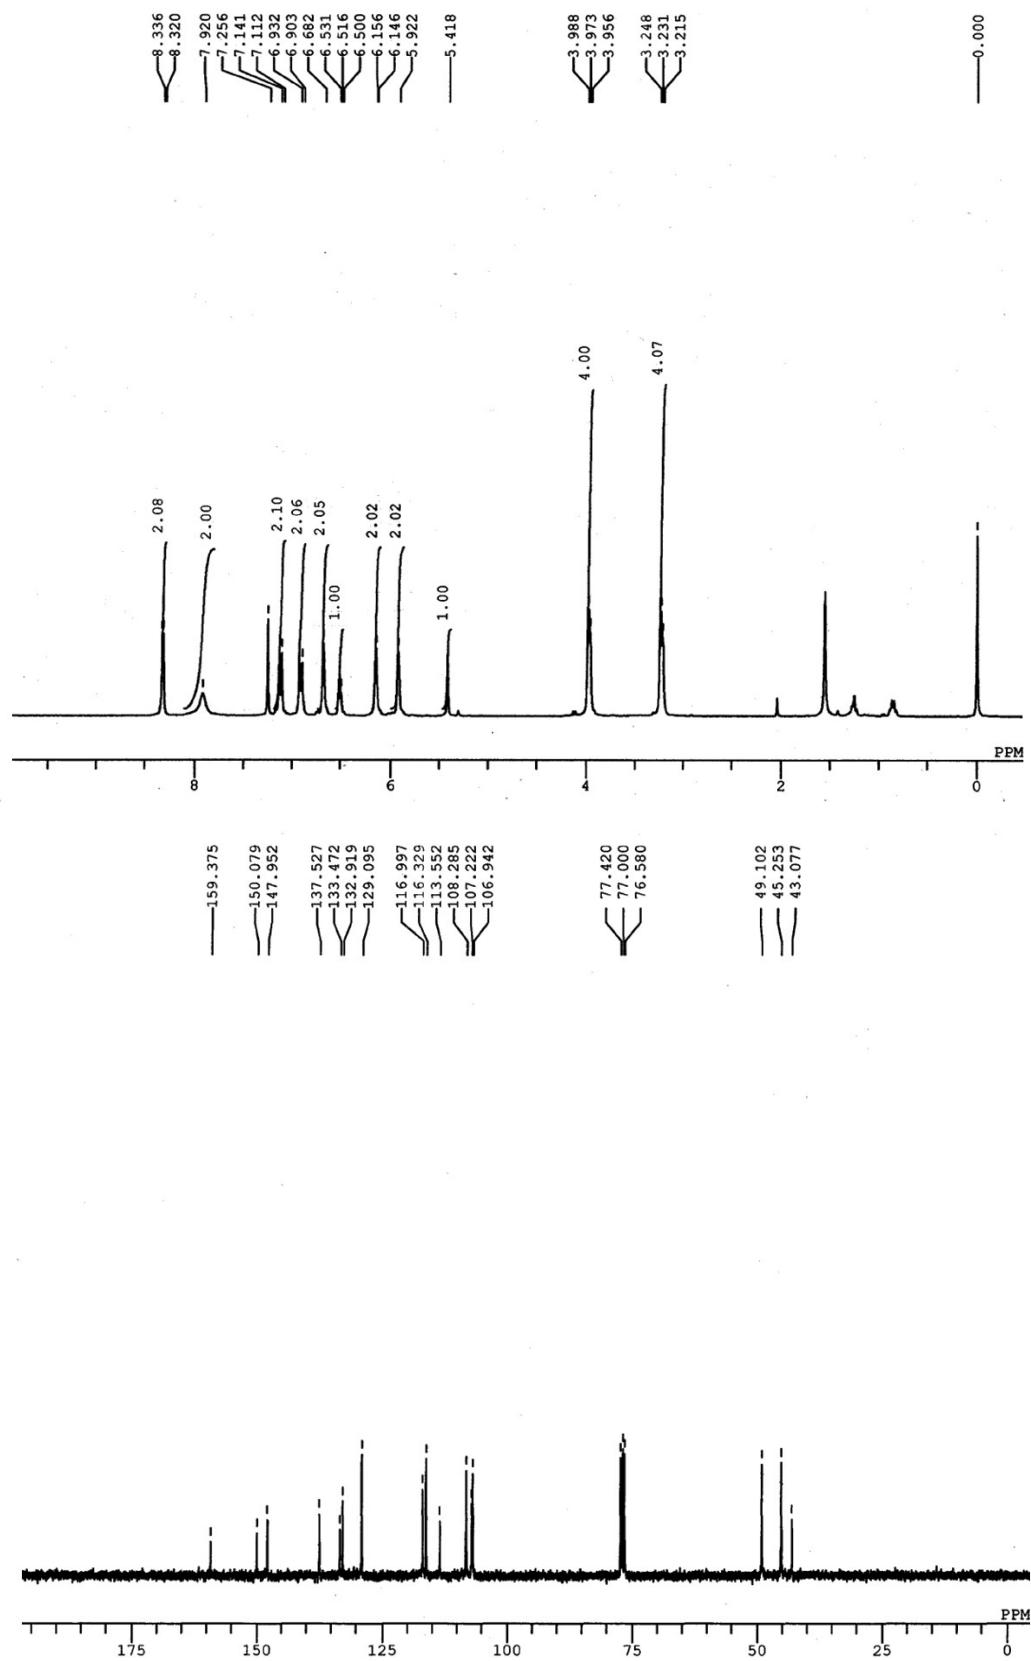

Fig. S3 <sup>1</sup>H (top) and <sup>13</sup>C NMR (bottom) spectrum of ligand (pypdpmH) in CDCl<sub>3</sub>.



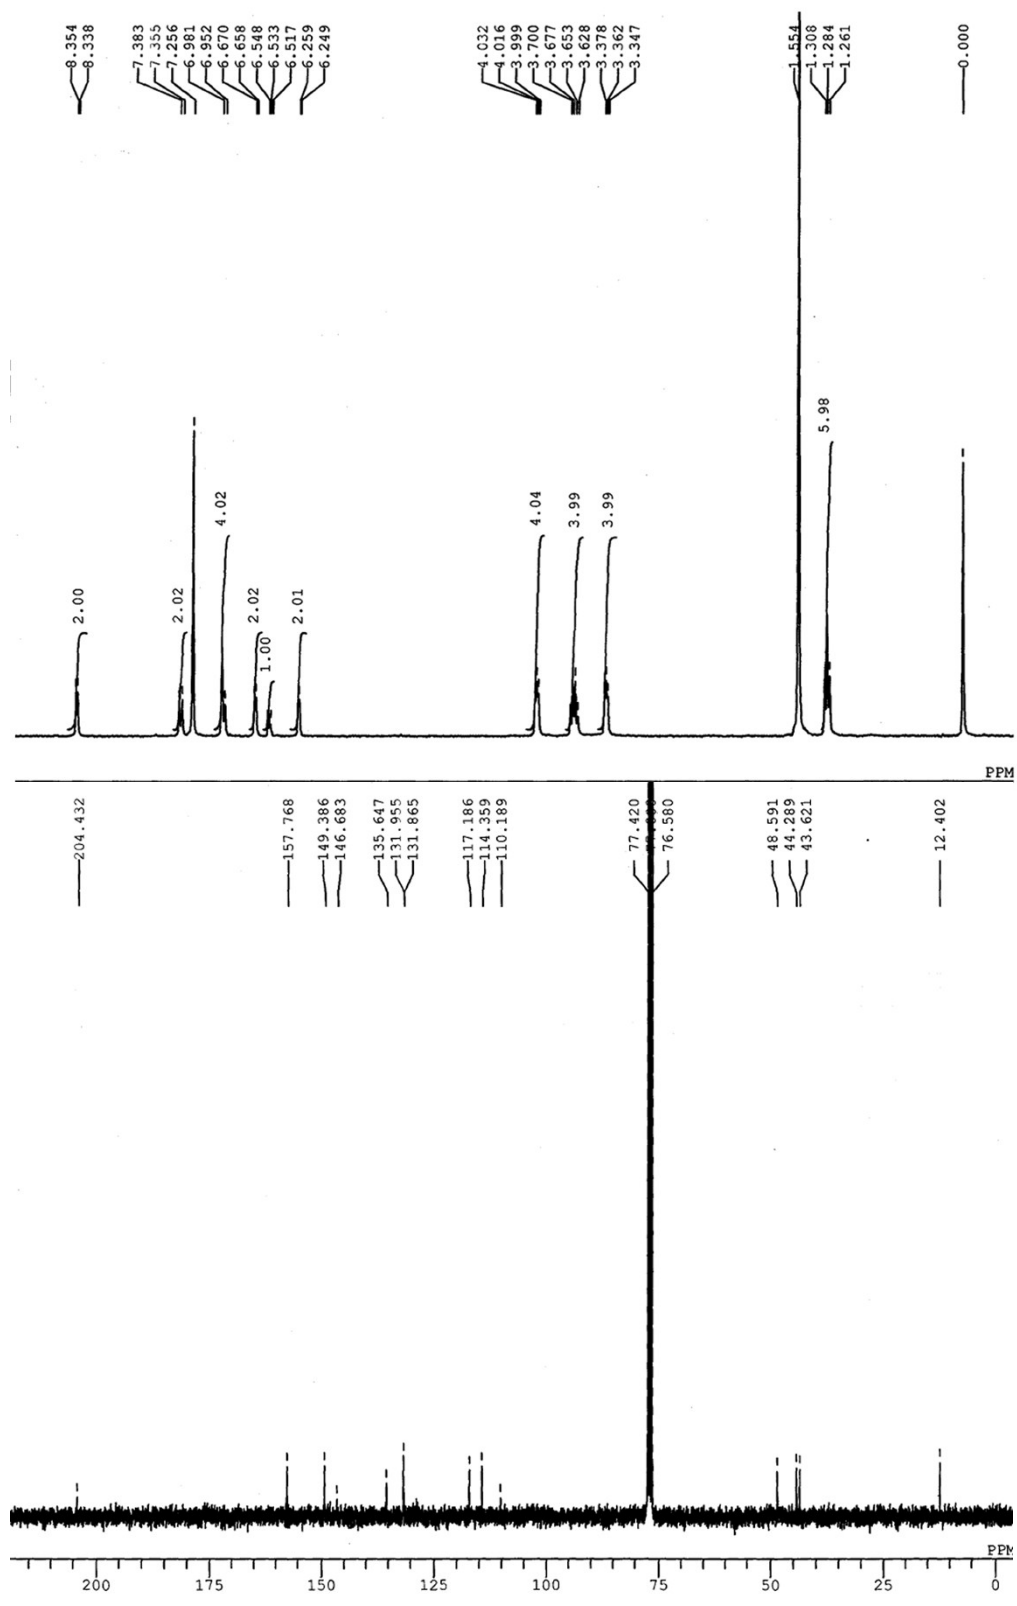

Fig. S4 <sup>1</sup>H (top) and <sup>13</sup>C NMR (bottom) spectrum of complex (1) in CDCl<sub>3</sub>.

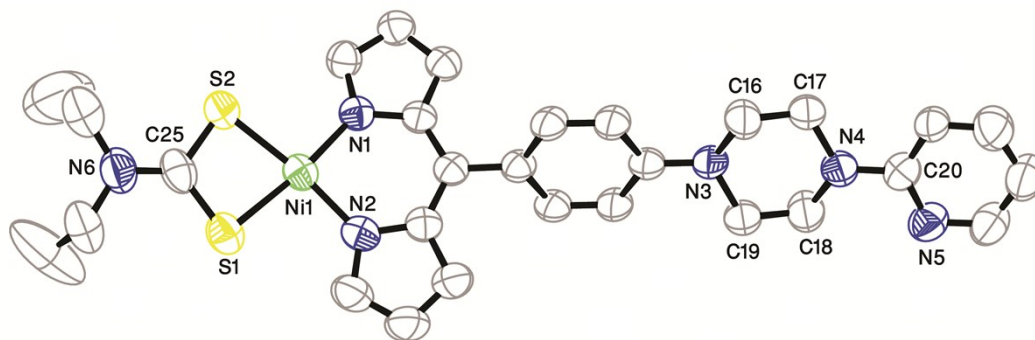

**Fig. S5** ORTEP view of **1** at 50% thermal ellipsoid probability (H-atoms omitted for clarity).

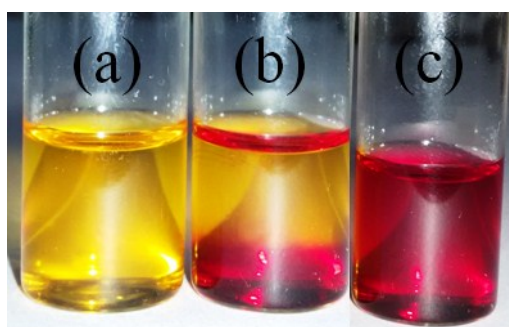

**Fig. S6** Colour changes for **1** (a), after addition of  $\text{HAuCl}_4$  immediately (b), after shaking (c).

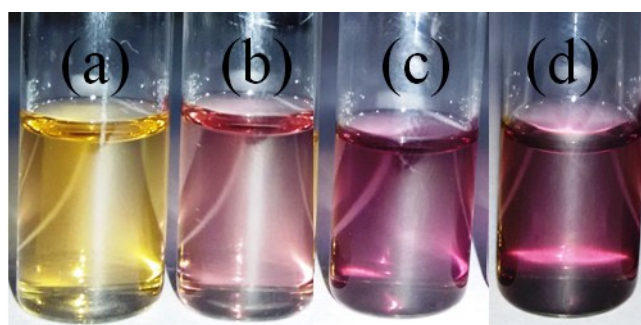

**Fig. S7** Colour changes of **pydpmH** (a), after addition of  $\text{HAuCl}_4$  5 min (b), 10 min (c) 15 min (d).

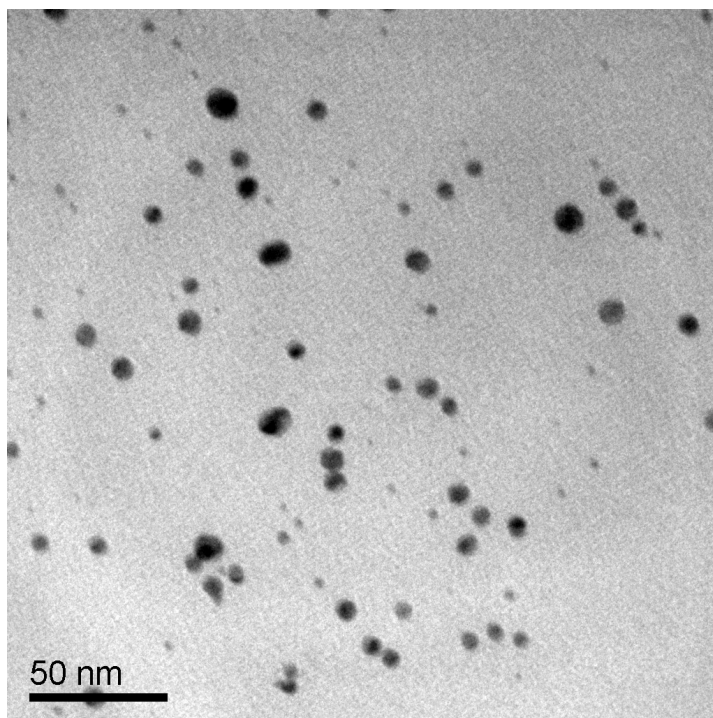

**Fig. S8** TEM image of AuNPs synthesized from pydpmH.

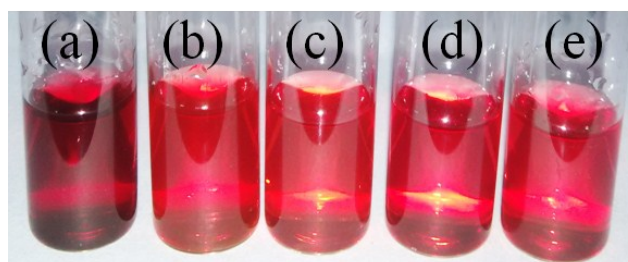

**Fig. S9** Colour of AuNPs in methanol (a), ethanol (b) acetonitrile (c), dimethylformamide (d) and dimethyl sulfoxide (e).

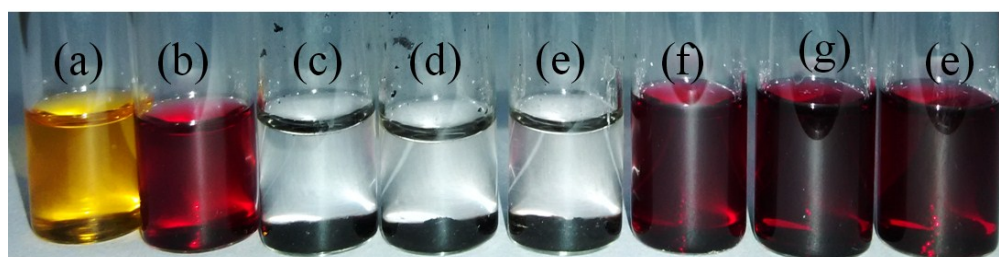

**Fig. S10** Colour of **1** (a), AuNPs (b), AuNPs@prGO100 (c), AuNPs@prGO300 (d), AuNPs@prGO500 nanocomposites (e), nanocomposites dissolved in DMF and triple distilled water (5%, v/v) AuNPs@prGO100 (f), AuNPs@prGO300 (g), AuNPs@prGO500 (h).

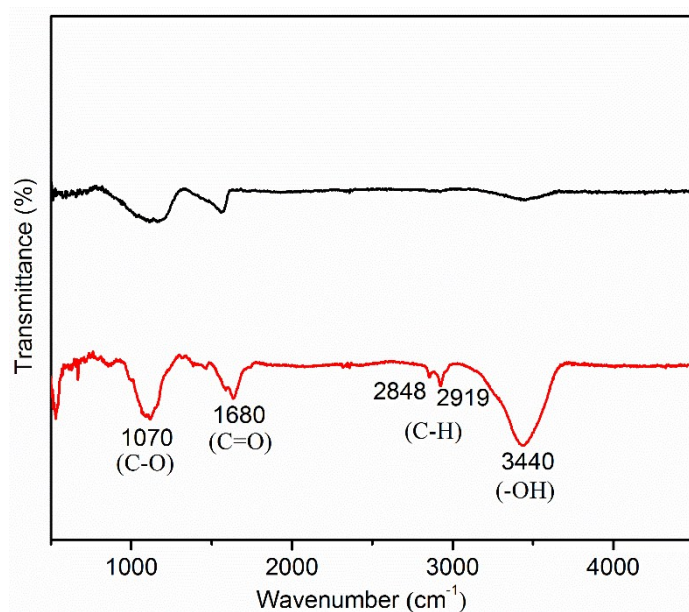

**Fig. S11** FTIR spectra of GO (Red Curve) and AuNPs@prGO500 (Black curve)

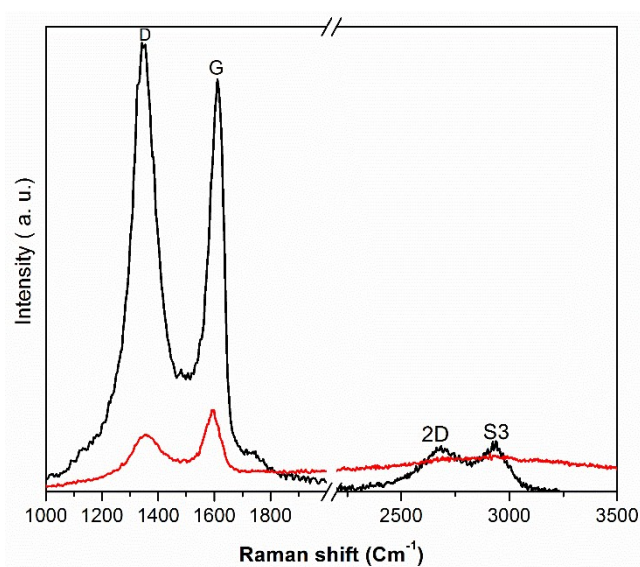

**Fig. S12** Raman spectra of GO (red) and AuNPs@prGO500 (black). In AuNPs@prGO500 (after reduction), the intensity ratio  $I_D/I_G$  increased significantly than that of GO. In addition, the appearance of prominent 2D and S3 peaks in AuNPs@prGO500 further confirms better graphitization in AuNPs@prGO500.

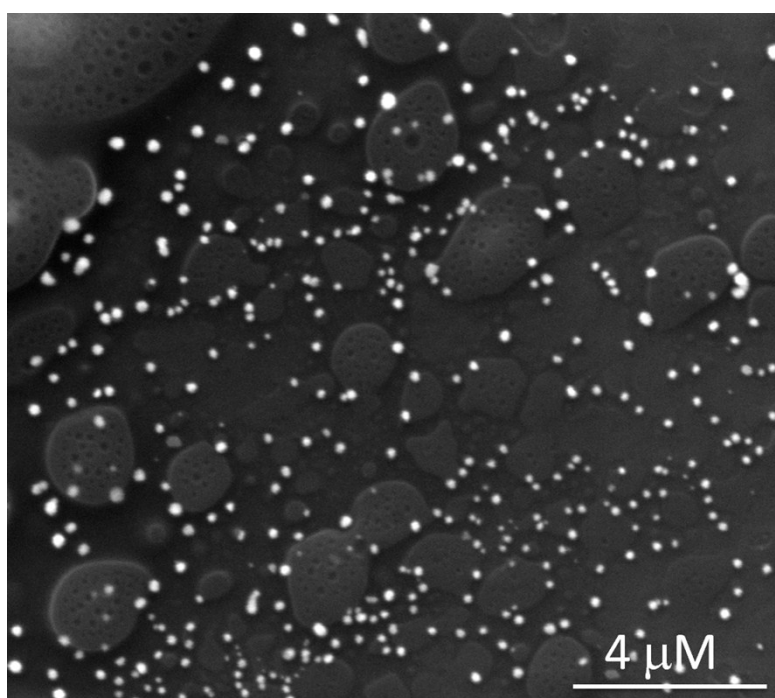

**Fig. S13** SEM image of AuNPs synthesized from complex 1.

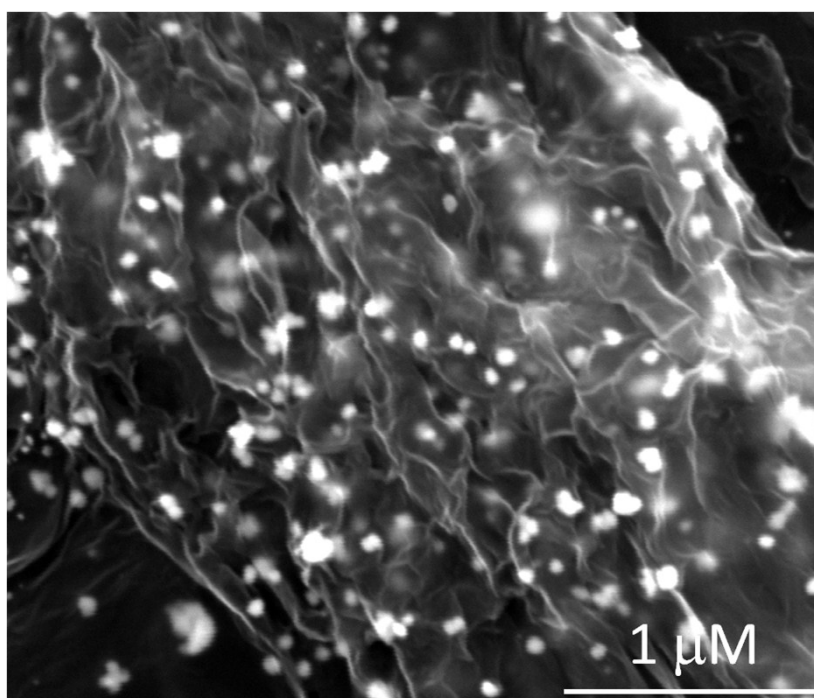

**Fig. S14** SEM image of AuNPs@prGO100.



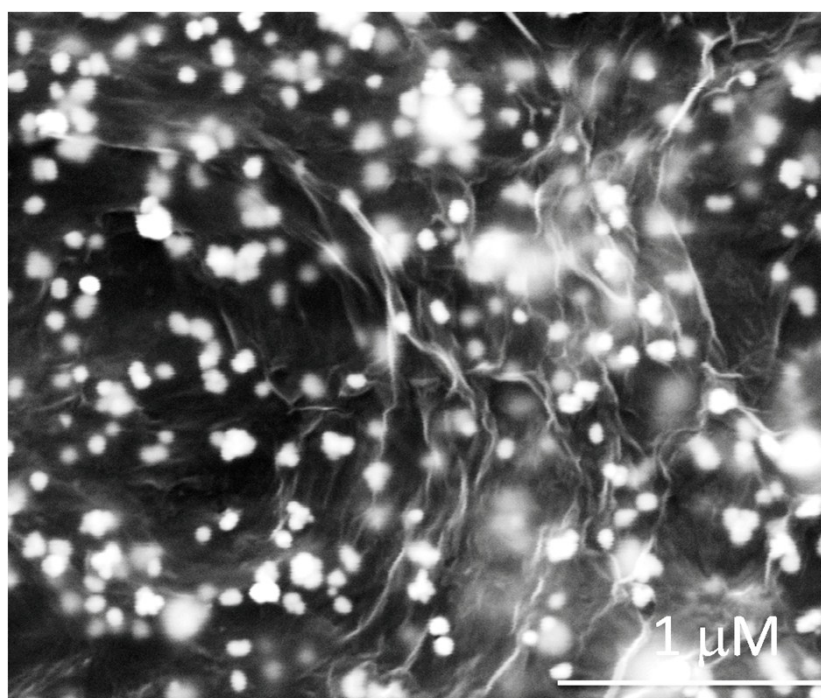

**Fig. S15** SEM image of AuNPs@prGO300.

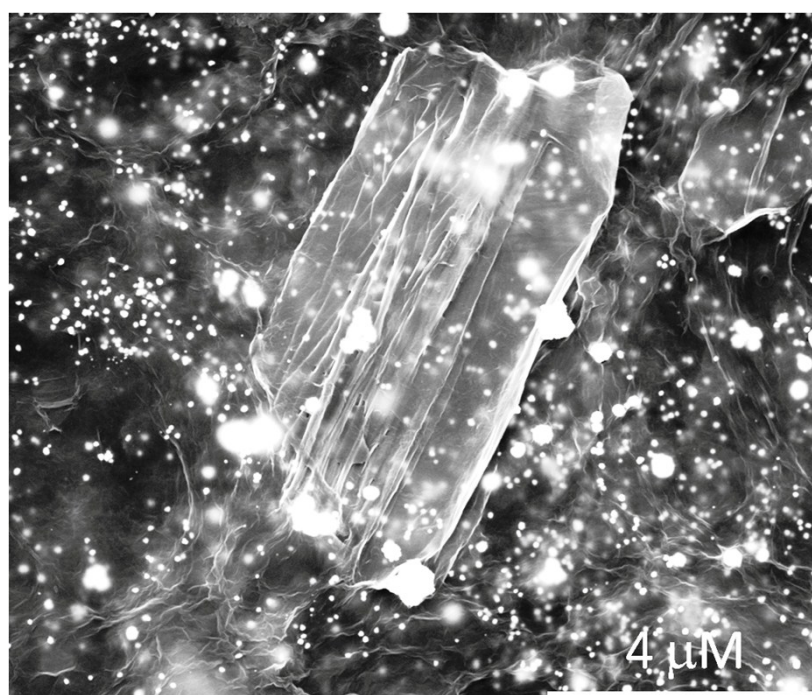

**Fig. S16** SEM image of AuNPs decorated on prGO@500.

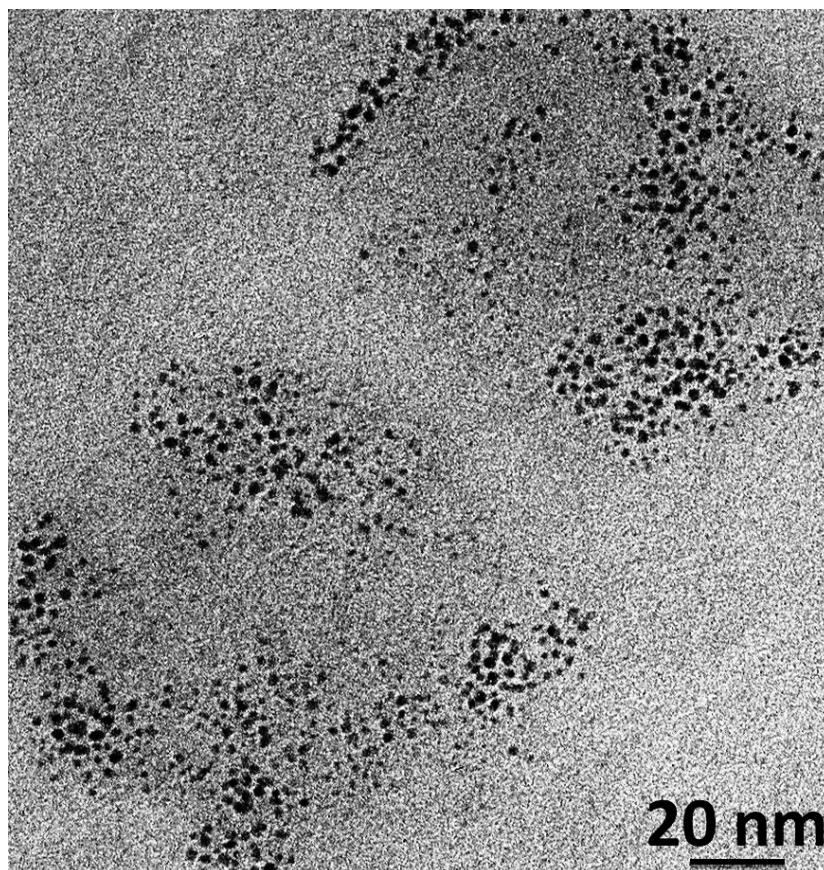

**Fig. S17** TEM image of AuNPs.

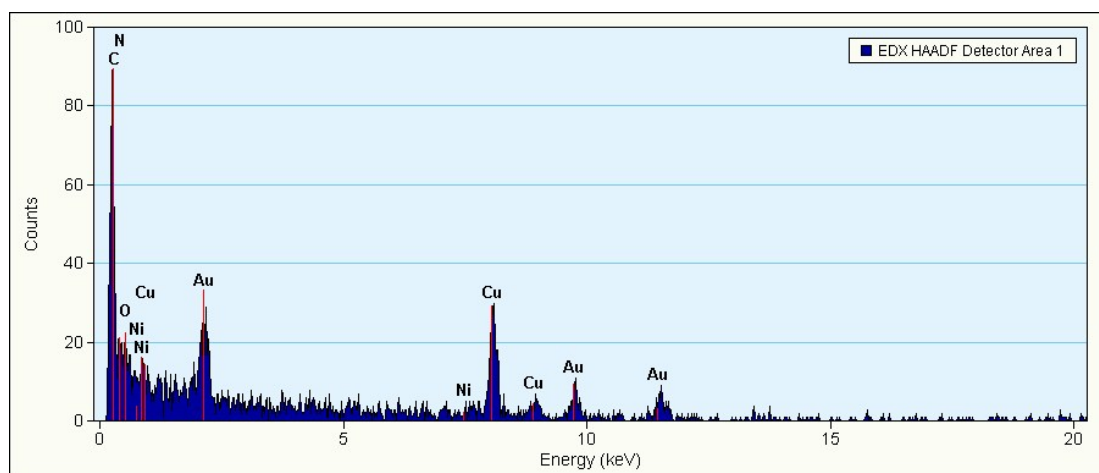

**Fig. S18** Energy-dispersive X-ray analysis (EDX) pattern of AuNPs.

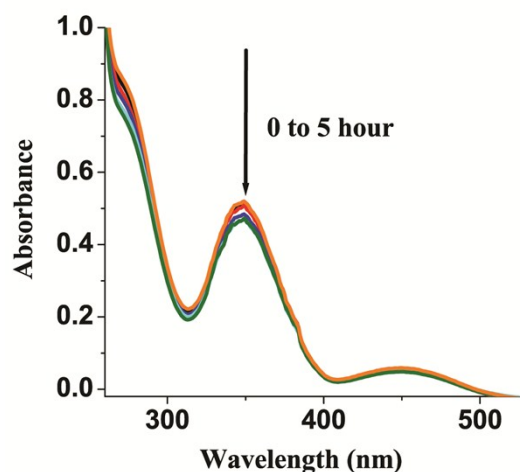

**Fig. S19** UV- vis spectra for reductive conversion of Cr(VI) to Cr(III) in dark for 5 hour  $[\text{Cr}_2\text{O}_7^{2-}] = 0.2 \text{ mM}$ .

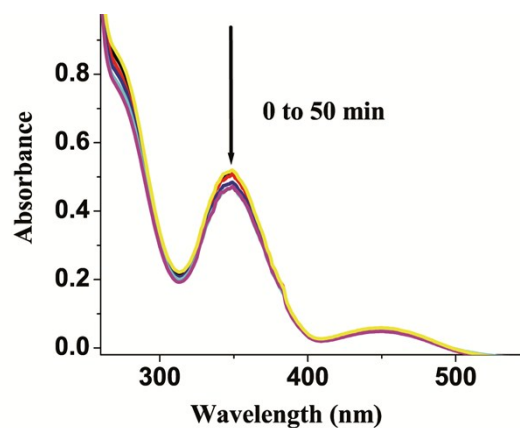

**Fig. S20** UV- vis spectra for reductive conversion of Cr(VI) to Cr(III) only in the presence HCOOH. Reaction condition: HCOOH = 0.2 ml,  $[\text{Cr}_2\text{O}_7^{2-}] = 0.2 \text{ mM}$ .

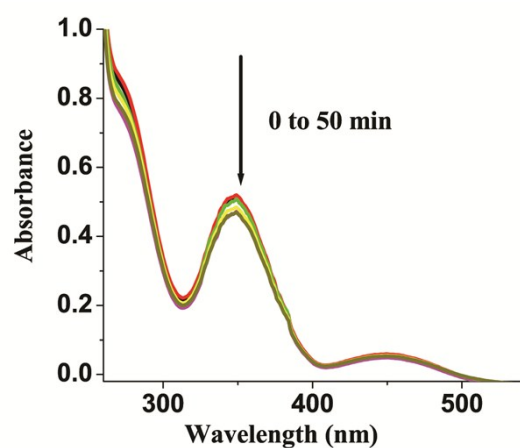

**Fig. S21** UV- vis spectra for reductive conversion of Cr(VI) to Cr(III) only in the presence AuNPs@prGO500. Reaction condition: AuNPs@prGO500 = 1 mg/mL (25  $\mu\text{L}$ ).  $[\text{Cr}_2\text{O}_7^{2-}] = 0.2 \text{ mM}$ .



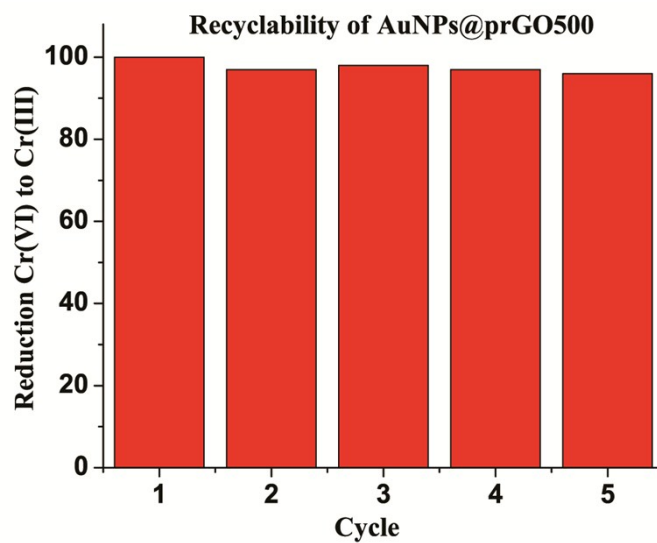

**Fig. S22** Recyclability of AuNPs@prGO500 for Cr(VI) to Cr(III) reduction. Reaction conditions: HCOOH = 0.2 mL,  $[\text{Cr}_2\text{O}_7^{2-}] = 0.2 \text{ mM}$  and AuNPs@prGO500 = 1 mg/mL (25  $\mu\text{L}$ ).

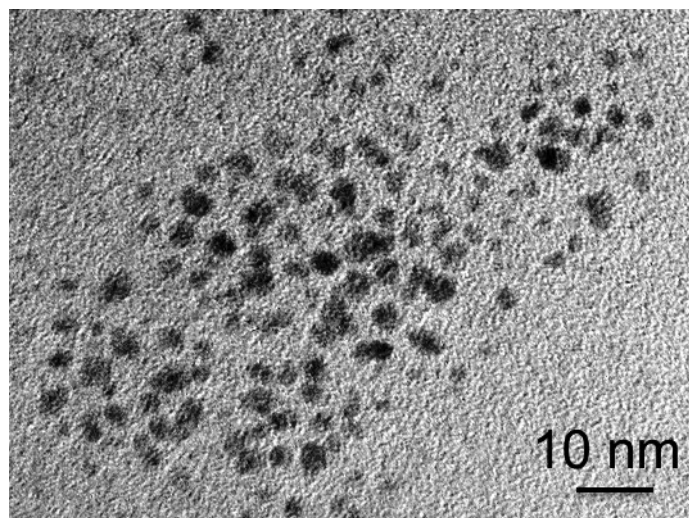

**Fig. S23** TEM image of AuNPs@prGO500 after 1<sup>st</sup> cycle of Cr(VI) reduction.

**Table S1** Crystal data and structure refinement parameters for **1**.

|                                                                       |                                                                 |
|-----------------------------------------------------------------------|-----------------------------------------------------------------|
| Empirical formula                                                     | C <sub>29</sub> H <sub>32</sub> N <sub>6</sub> NiS <sub>2</sub> |
| Crystal system                                                        | Monoclinic                                                      |
| Space group                                                           | <i>P</i> 2 <sub>1</sub> / <i>n</i>                              |
| <i>a</i> (Å)                                                          | 11.023(2)                                                       |
| <i>b</i> (Å)                                                          | 10.298(2)                                                       |
| <i>c</i> (Å)                                                          | 25.687(5)                                                       |
| $\alpha$ (deg)                                                        | 90.00                                                           |
| $\beta$ (deg)                                                         | 100.50(3)                                                       |
| $\gamma$ (deg)                                                        | 90.00                                                           |
| <i>V</i> (Å <sup>3</sup> ), <i>Z</i>                                  | 2867.2(10), 4                                                   |
| $\lambda$ (Å)                                                         | 0.71073                                                         |
| Color and habit                                                       | Red, needle                                                     |
| <i>T</i> (K)                                                          | 293(2)                                                          |
| reflns collected                                                      | 4362                                                            |
| reflins/restraint/params                                              | 6584/1/345                                                      |
| <i>D</i> <sub>calcd</sub> (Mg m <sup>-3</sup> )                       | 1.361                                                           |
| $\mu$ (mm <sup>-1</sup> )                                             | 0.852                                                           |
| GOF on <i>F</i> <sup>2</sup>                                          | 1.071                                                           |
| final <i>R</i> indices <i>I</i> >2 $\sigma$ ( <i>I</i> ) <sup>a</sup> | R1 = 0.0534                                                     |
|                                                                       | wR2 = 0.1672                                                    |
| <i>R</i> indices (all data) <sup>a</sup>                              | R1 = 0.0708                                                     |
|                                                                       | wR2 = 0.1545                                                    |

**Table S2** Selected bond lengths (Å) and angles (°) for **1**.

| <b>Bond length (Å)</b> | <b>1</b>  |
|------------------------|-----------|
| Ni–N1                  | 1.89(3)   |
| Ni–N2                  | 1.89(3)   |
| Ni–S1                  | 2.20(13)  |
| Ni–S2                  | 2.20(13)  |
| C25–S1                 | 1.70(5)   |
| C25–S2                 | 1.72(4)   |
| C16–N3                 | 1.44(5)   |
| C19–N3                 | 1.44(5)   |
| C17–N4                 | 1.45(5)   |
| C18–N4                 | 1.44(5)   |
| C20–N4                 | 1.36(5)   |
| <b>Bond angle (°)</b>  | <b>1</b>  |
| N2–Ni–N1               | 92.9(13)  |
| N2–Ni–S1               | 94.0(10)  |
| N1–Ni–S1               | 173.1(9)  |
| N2–Ni–S2               | 171.8(10) |
| N1–Ni–S2               | 95.1(9)   |
| S1–Ni–S2               | 78.0(5)   |
| C25–S1–Ni1             | 86.80(14) |
| C25–S2–Ni1             | 86.68(16) |
| C20–N4–C18             | 121.3(3)  |
| C20–N4–C17             | 120.7(3)  |
| C18–N4–C17             | 114.5(3)  |
| C13–N3–C19             | 118.6(3)  |
| C13–N3–C16             | 119.1(3)  |
| C19–N3–C16             | 113.9(3)  |
| C18–C19–N3             | 115.5(4)  |
| $\omega$               | 69.05     |

$\omega$  = the twist angle between dipyrin core and *meso*-phenyl substituent.
